# Supplementary material
Source: Springer Nature journal article supplement (https://www.springermedizin.de/resource/supplementary/12913_2013_2674_MOESM1_ESM.pdf/9531100)

(a)

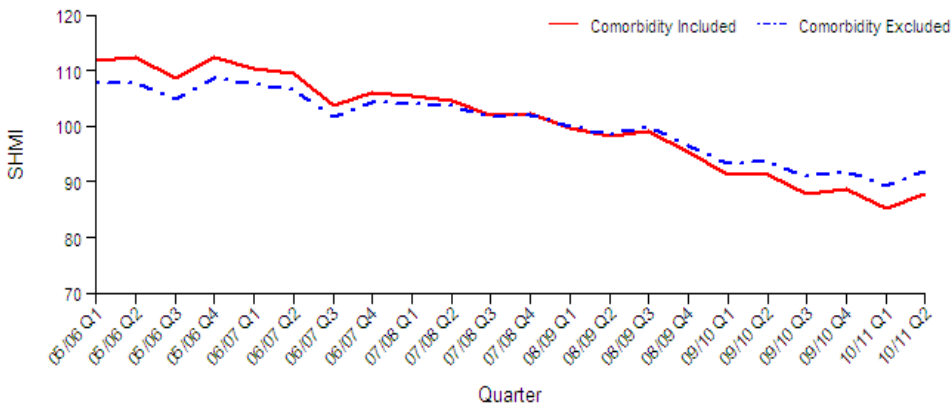

(b) Comorbidity Included

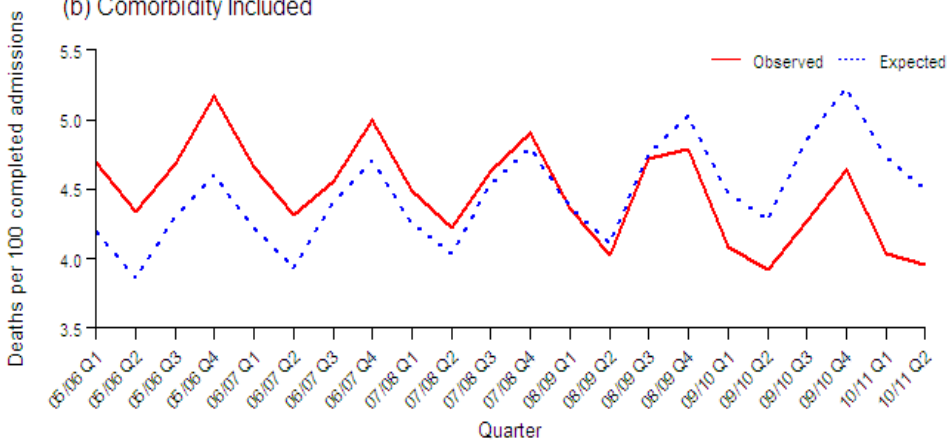

(c) Comorbidity Excluded

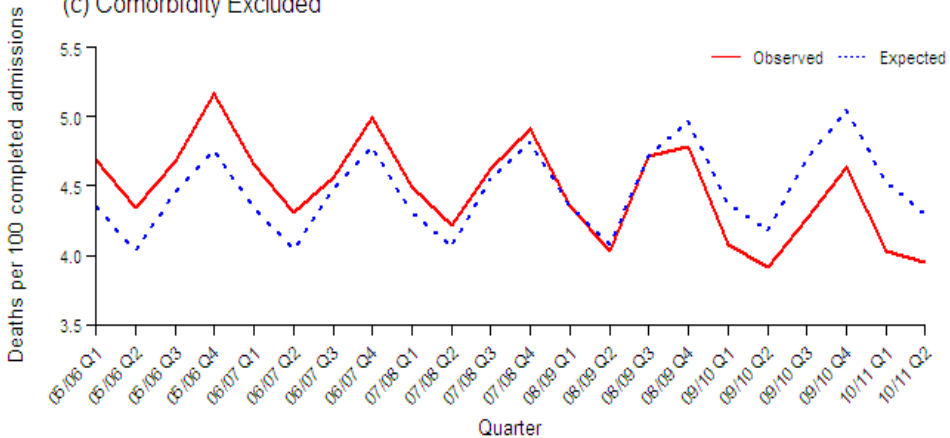

Supplement: MOESM1 [file 9531100]
